# Supplementary material
Source: PubMed Central journal article supplement (PMC9924039)

Supplemental Figures 1: Funnel Plots

Supplemental Figure 1a. 30-day readmissions funnel plot

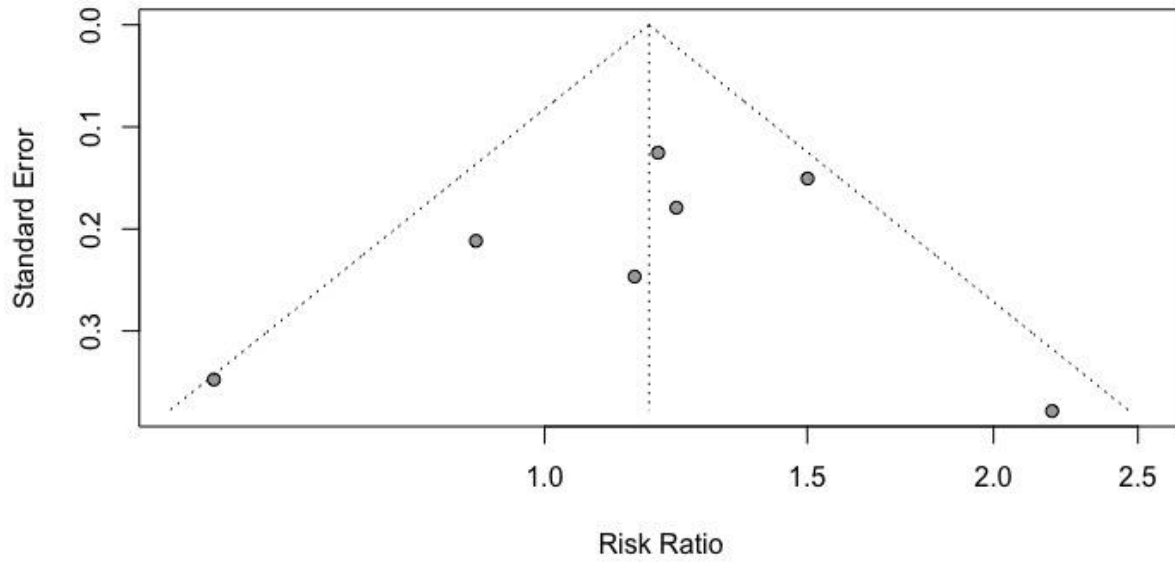

Supplemental Figure 1b. Length of stay funnel plot

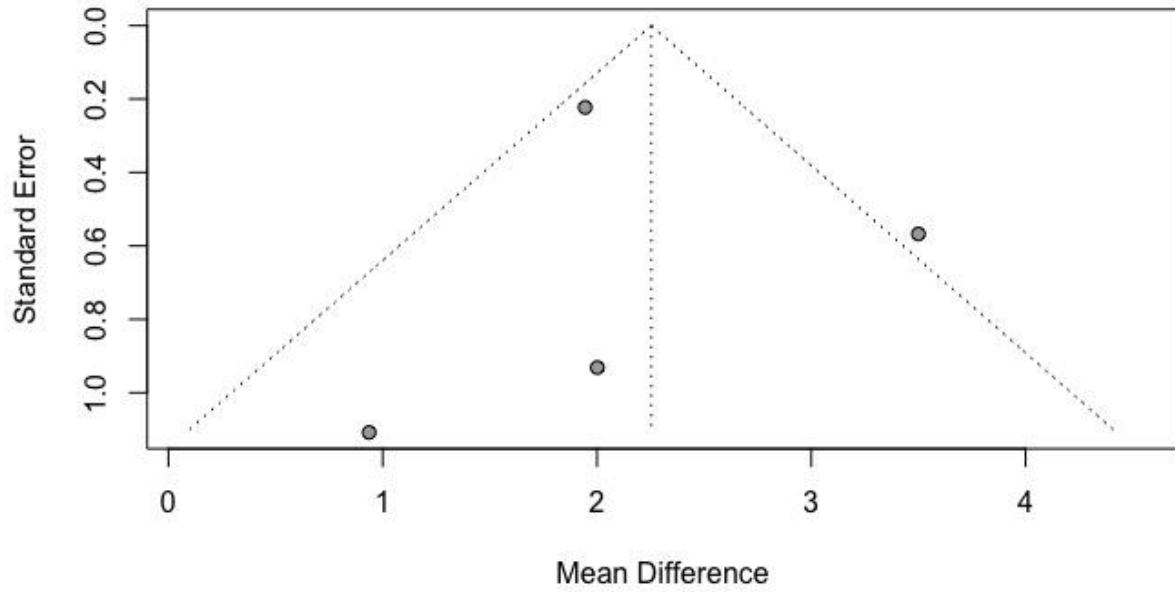

**Supplemental Figure 1c.** Prior IBD-related surgery funnel plot

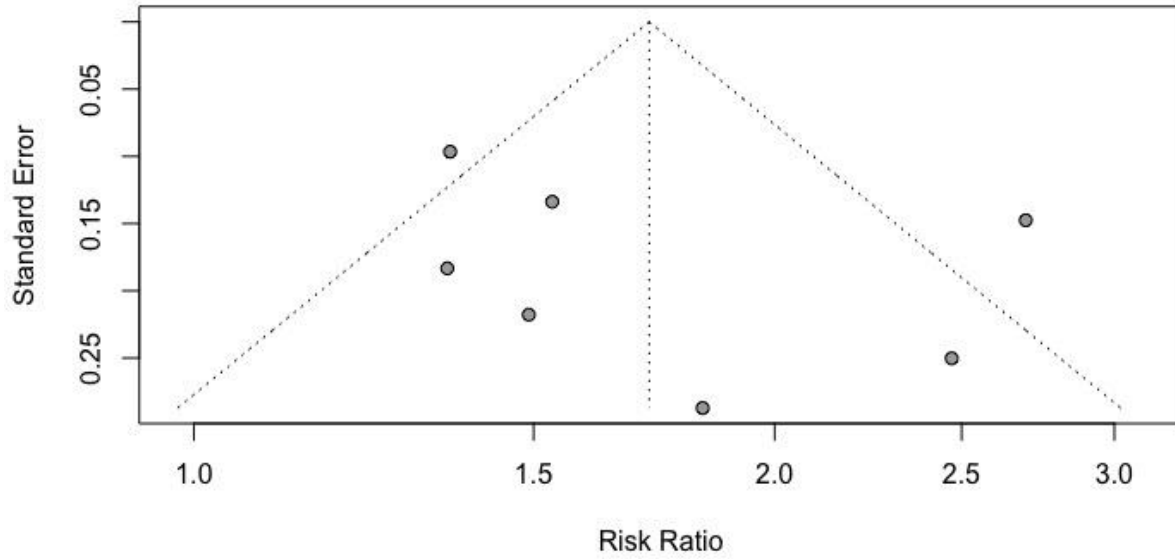

**Supplemental Figure 1d.** Current IBD-related surgery funnel plot

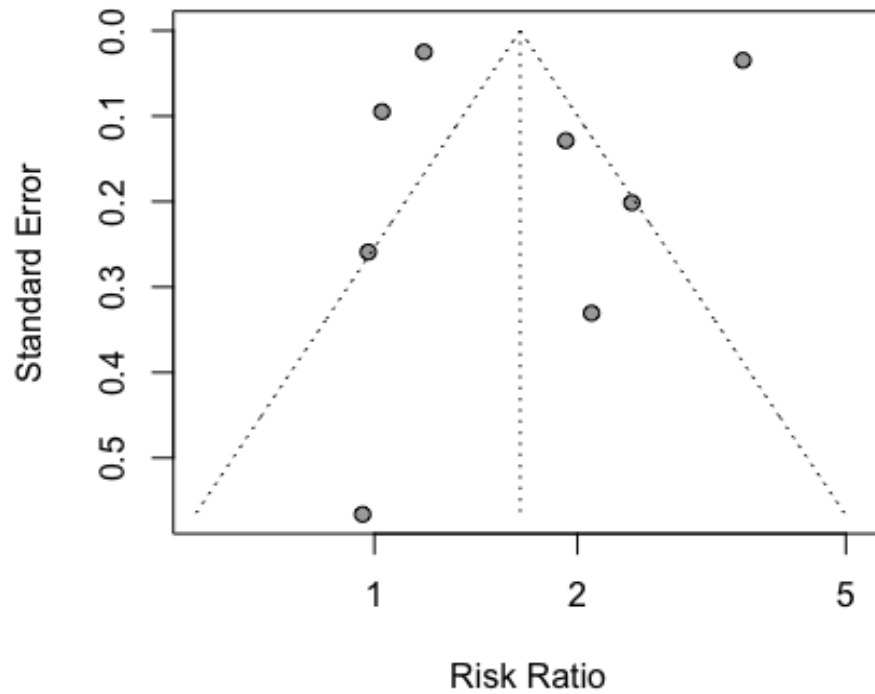

**Supplemental Figure 1e.** Biologics funnel plot

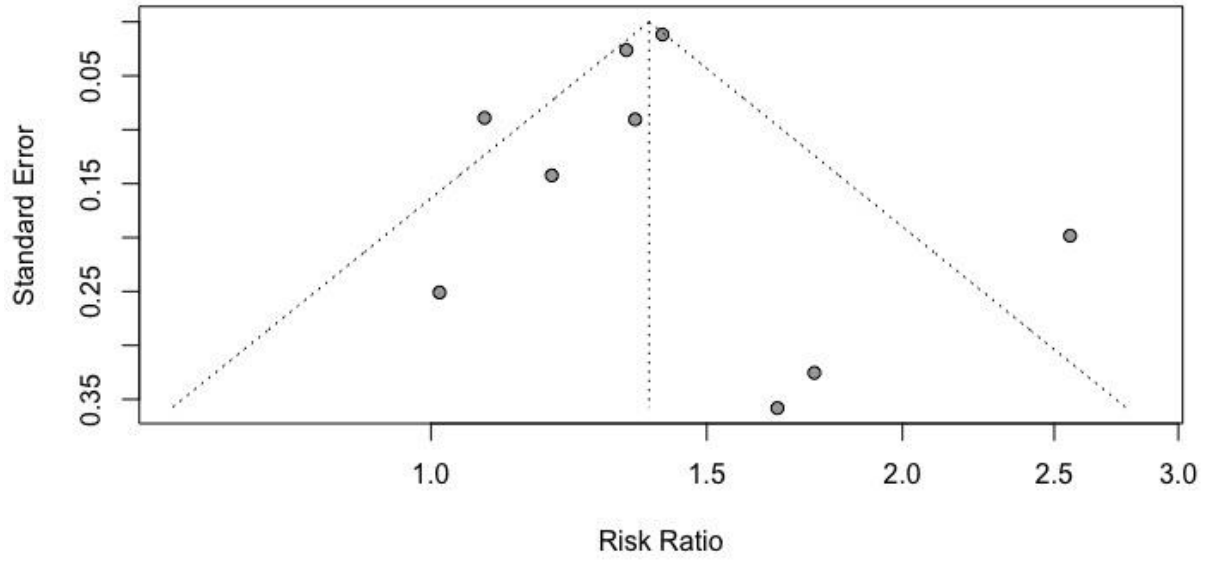

**Supplemental Figure 1f.** Immunomodulators funnel plot

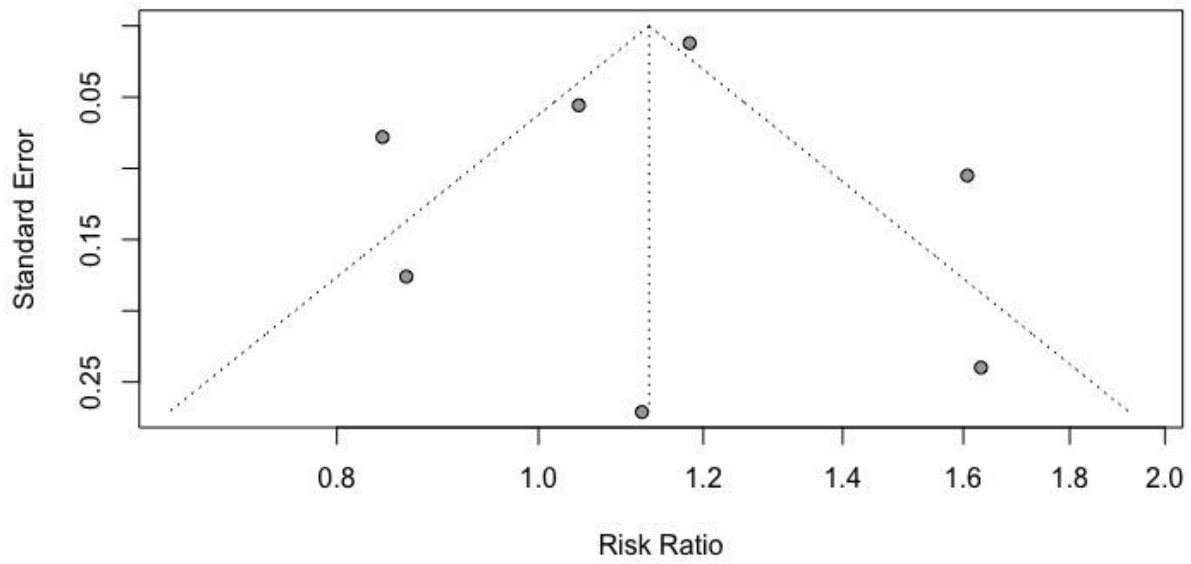

Supplemental Figure 1g. Steroids funnel plot

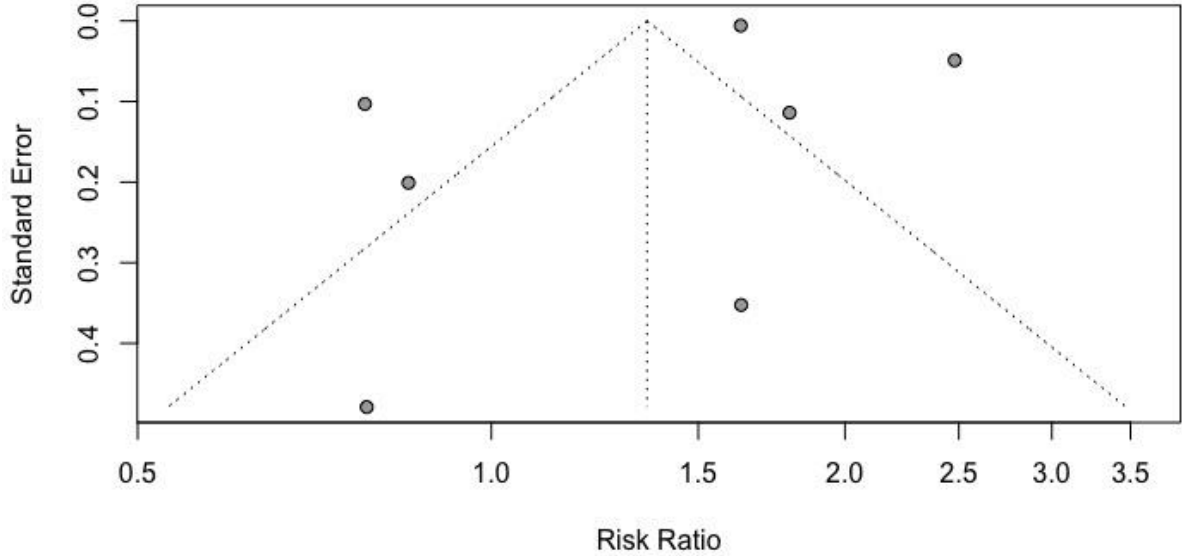

Supplemental Figures 2: Forest Plots for 30-Day Readmissions and Sensitivity Analysis

**Supplemental Figure 2a:** Association between 30-day readmissions and opioid use

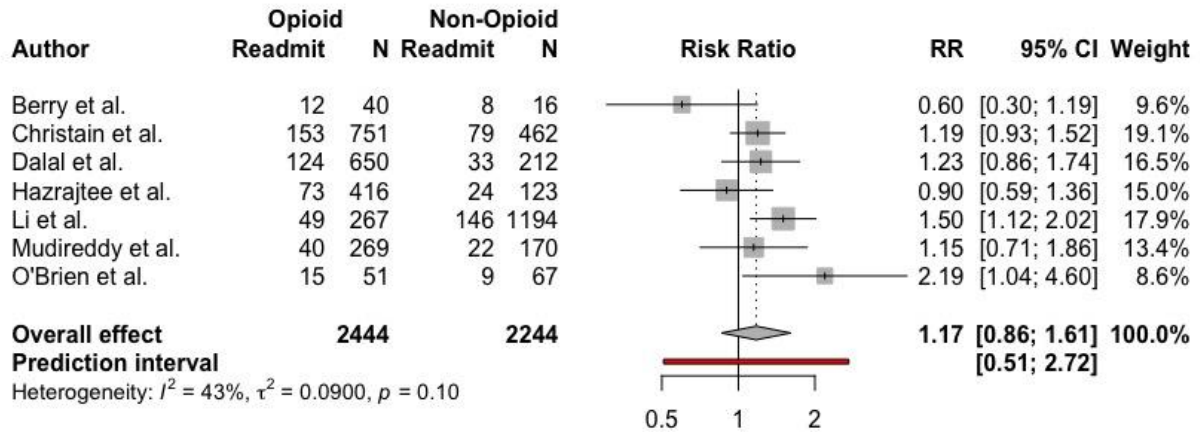

**Supplemental Figure 2b:** Sensitivity analysis including opioid use disorder in the exposure of interest

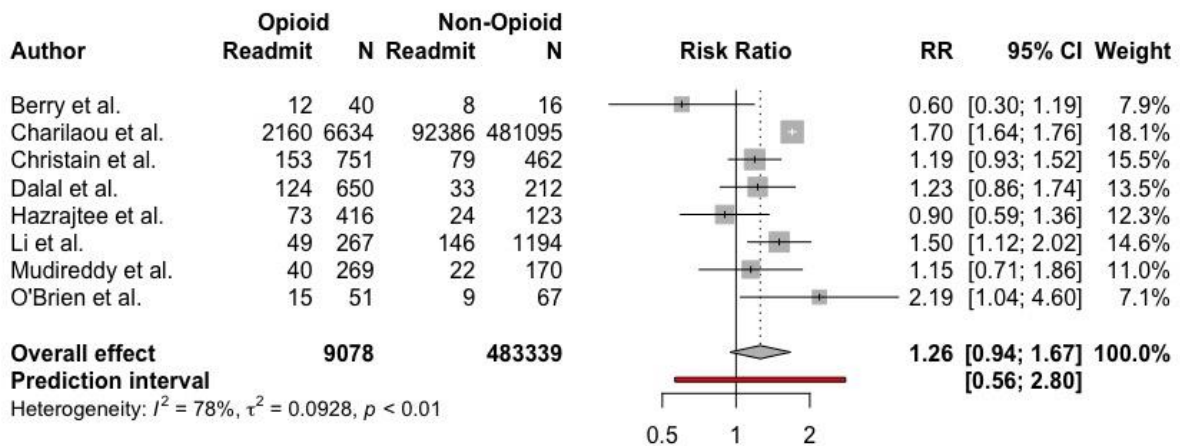

Supplemental Figures 3: Forest Plots of Subgroup Analysis

**Supplemental Figure 3ai.** Association between 30-day readmissions and opioid use prior to admission

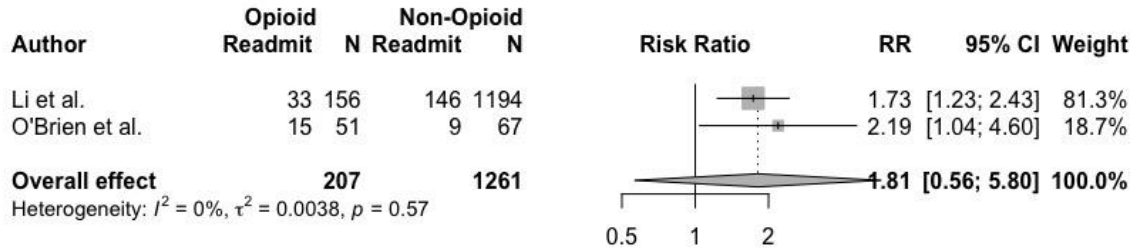

**Supplemental Figure 3aii.** Association between 30-day readmissions and opioid use during admission

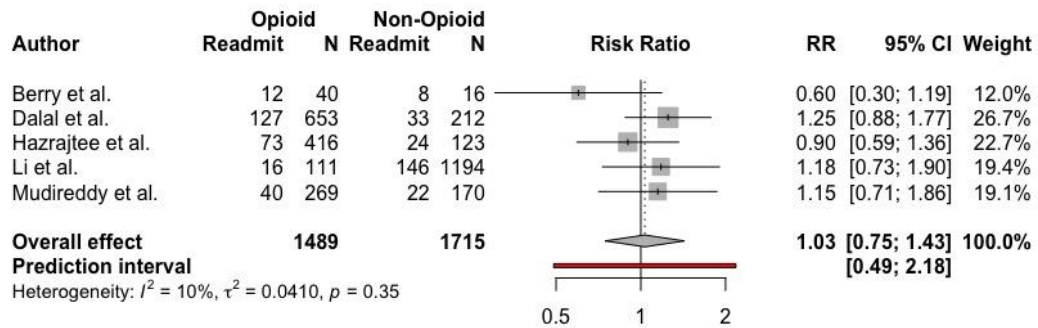

**Supplemental Figure 3aiii.** Association between 30-day readmissions and opioid use at discharge

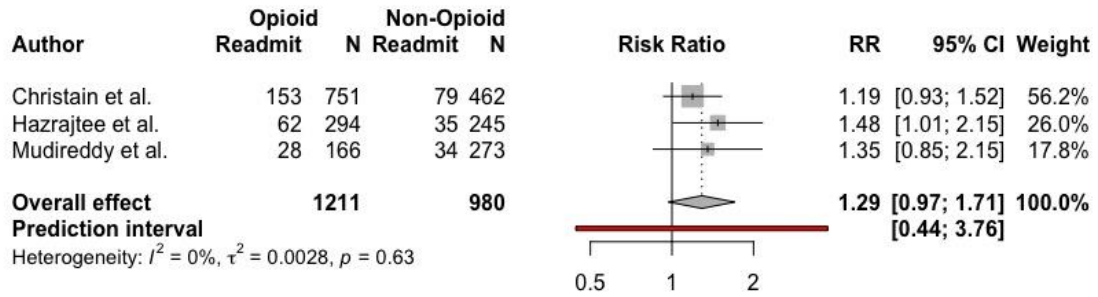

**Supplemental Figure 3bi.** Association between prior IBD-related surgery and outpatient opioid use

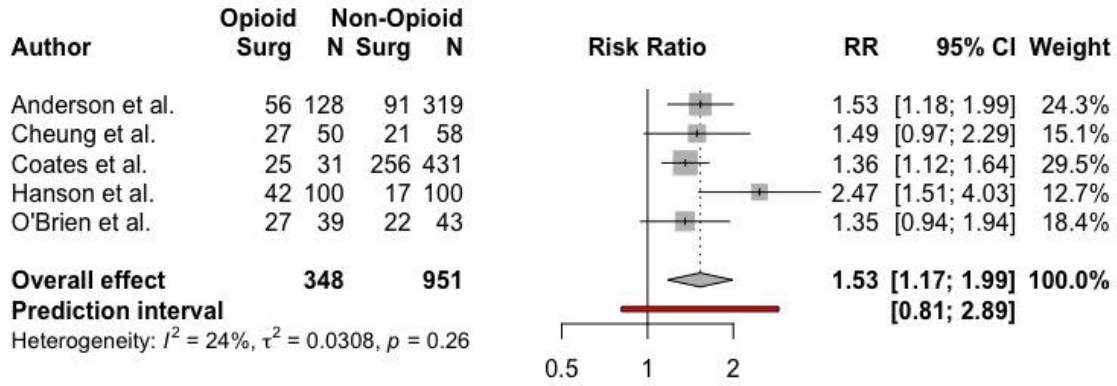

**Supplemental Figure 3bii.** Association between prior IBD-related surgery and inpatient opioid use

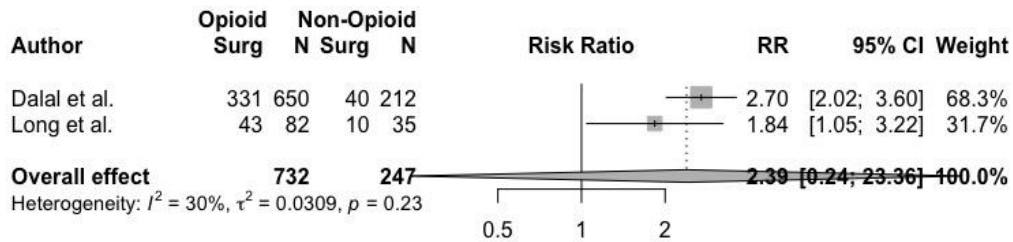



**Supplemental Figure 3ci.** Association between current IBD-related surgery and outpatient opioid use

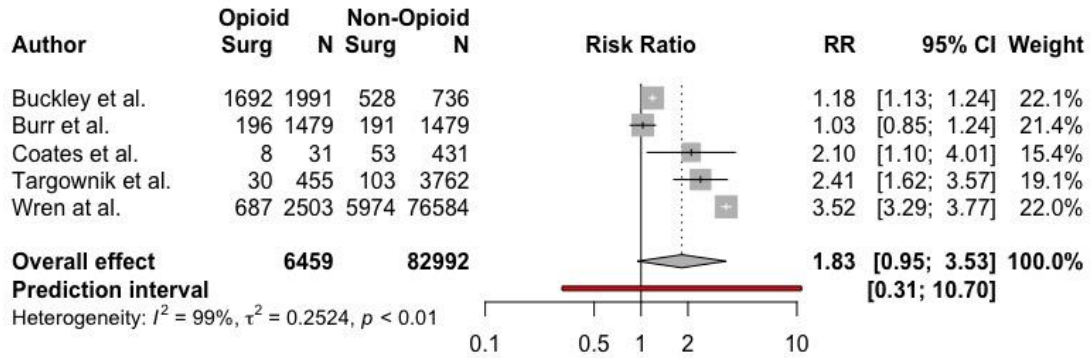

**Supplemental Figure 3cii.** Association between current IBD-related surgery and inpatient opioid use

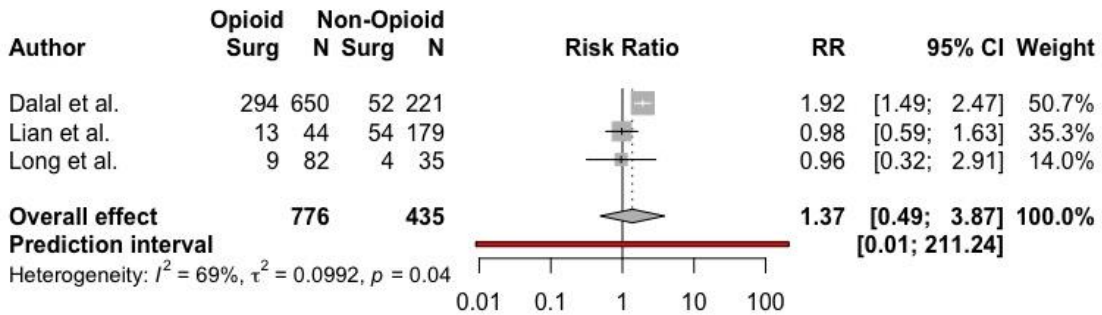

Supplement: izac021_suppl_supplementary_material.pdf [file izac021_suppl_supplementary_material.pdf]
